# Supplementary material for: Towards i5 Ecohydraulics: Field Determination of Manning’s Roughness Coefficient, Drag Force, and Macroinvertebrate Habitat Suitability for Various Stream Vegetation Types
Source: MDPI journal article supplement (doi:10.3390/w14223727), 2022-11-17
Supplement: s1 [file s1]

Archive with 1 entries (1 files):
- water-2012802-supplementary.pdf
