# Supplementary material for: Towards i5 Ecohydraulics: Field Determination of Manning’s Roughness Coefficient, Drag Force, and Macroinvertebrate Habitat Suitability for Various Stream Vegetation Types
Source: MDPI journal article supplement (doi:10.3390/w14223727), 2022-11-17
Supplement: s1 [file s1 › water-2012802-supplementary.pdf]

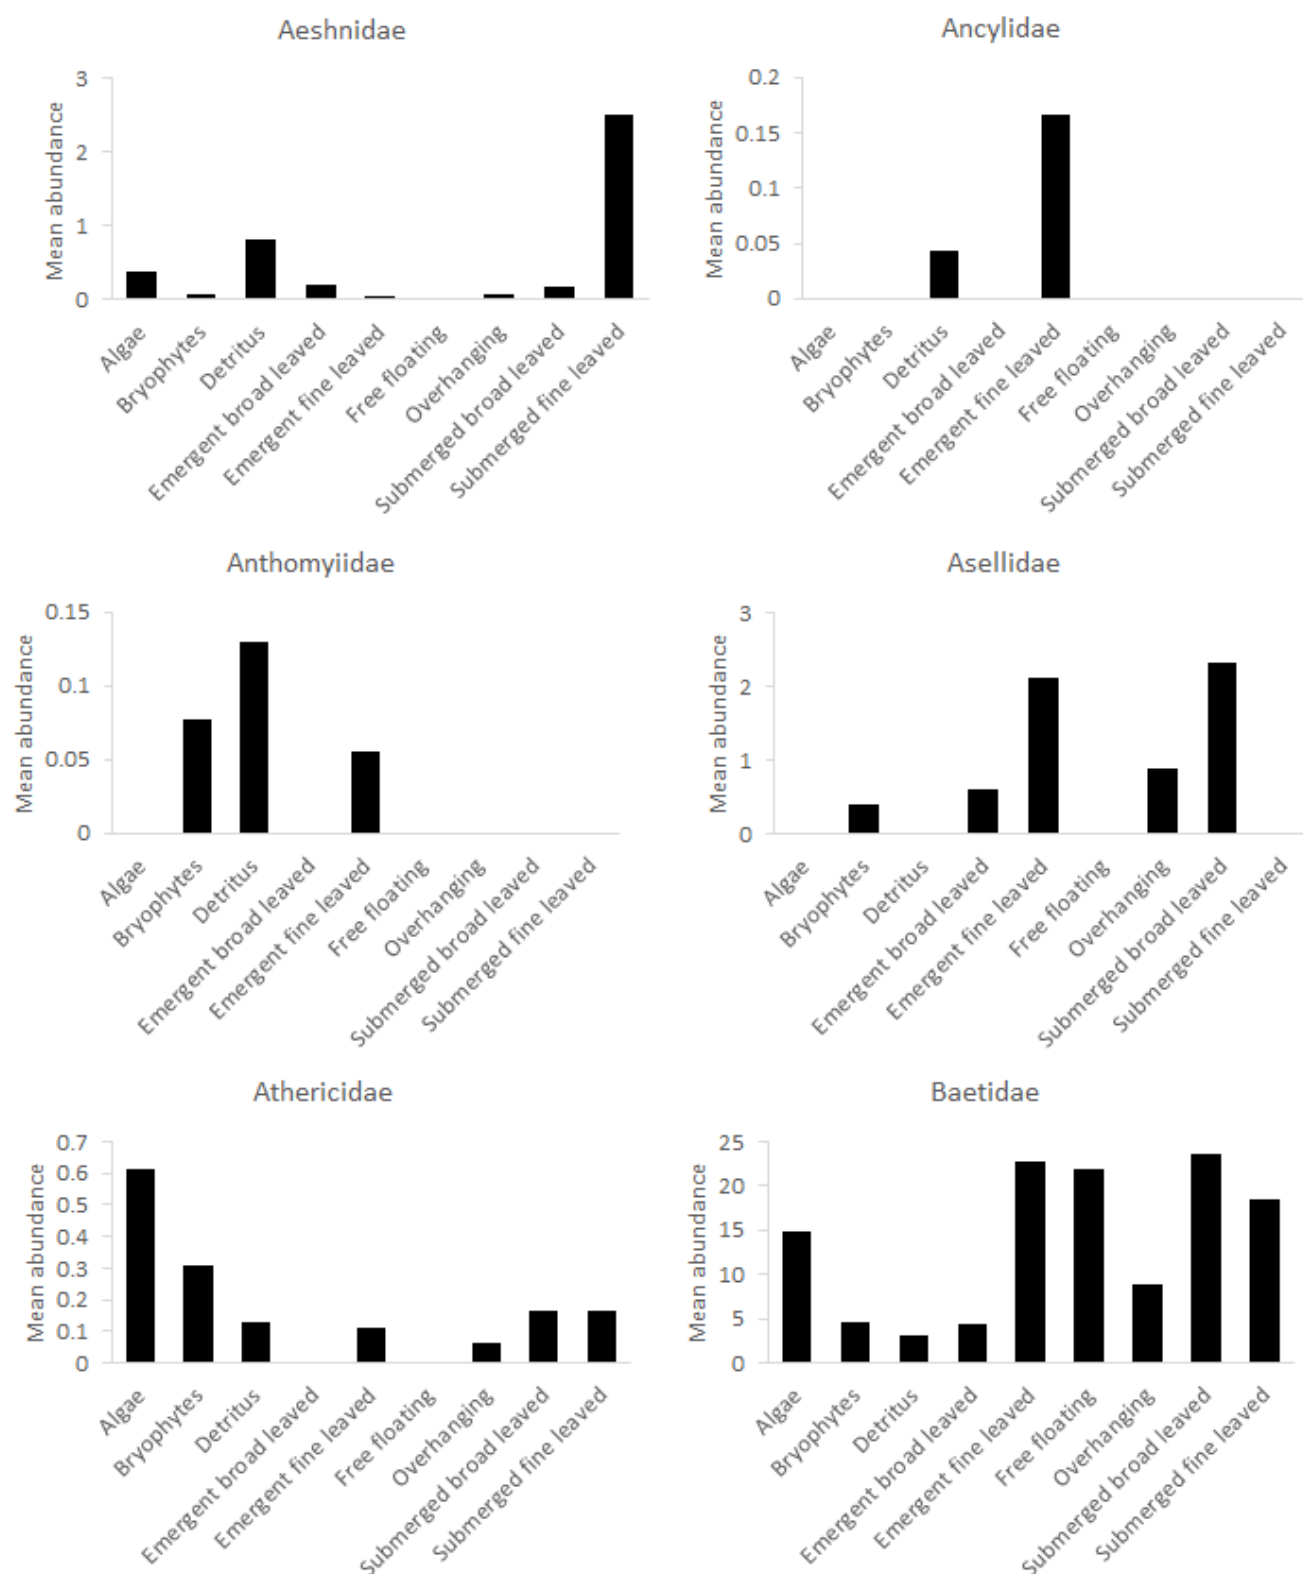

**Figure S1.** Mean abundance (total abundance divided by the number of sampled microhabitats) per type of bottom/riparian vegetation for each macroinvertebrate taxon.

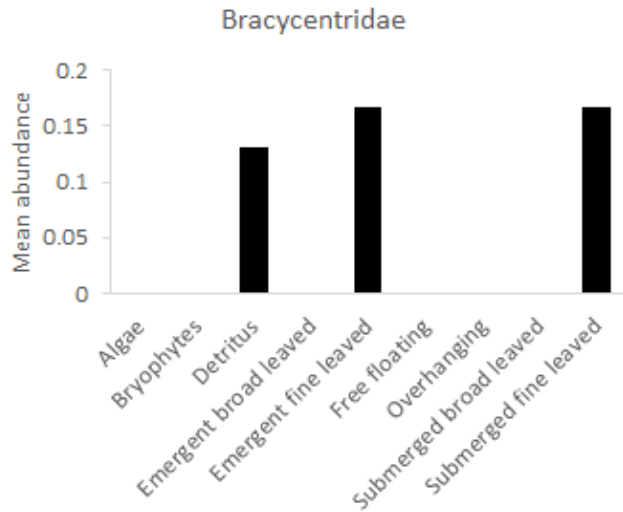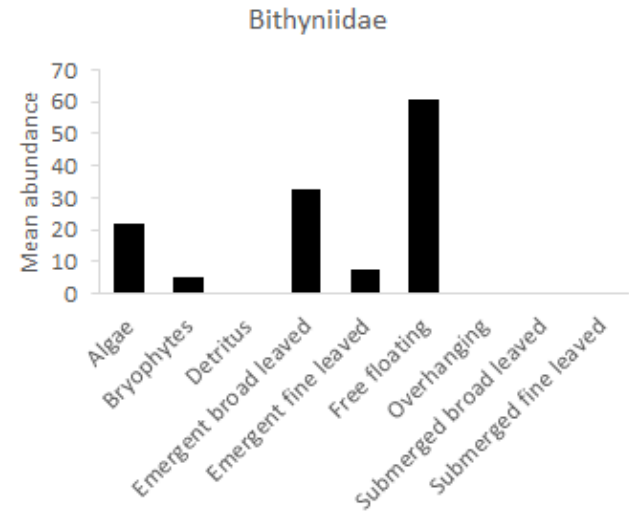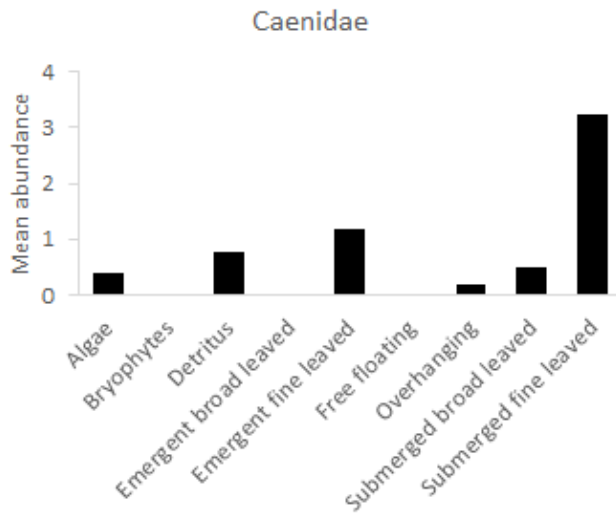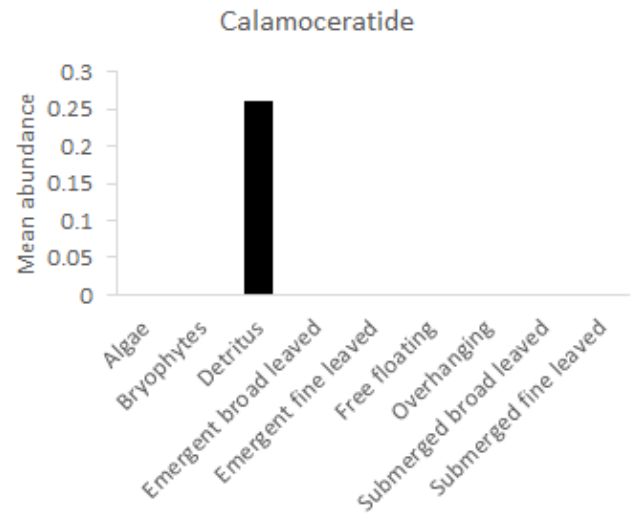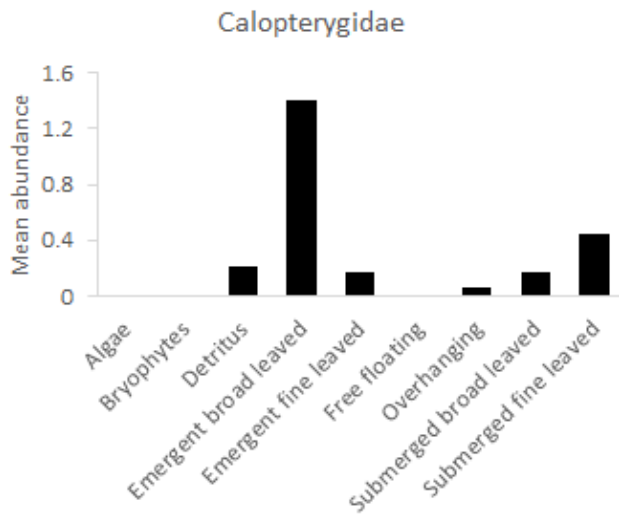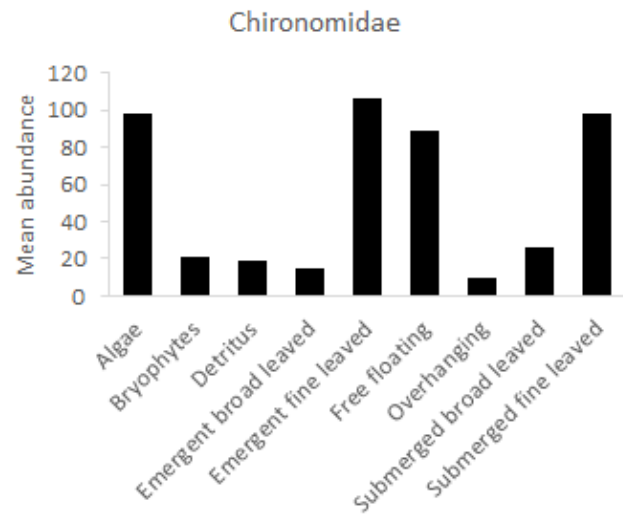

Figure S1 (Continued).

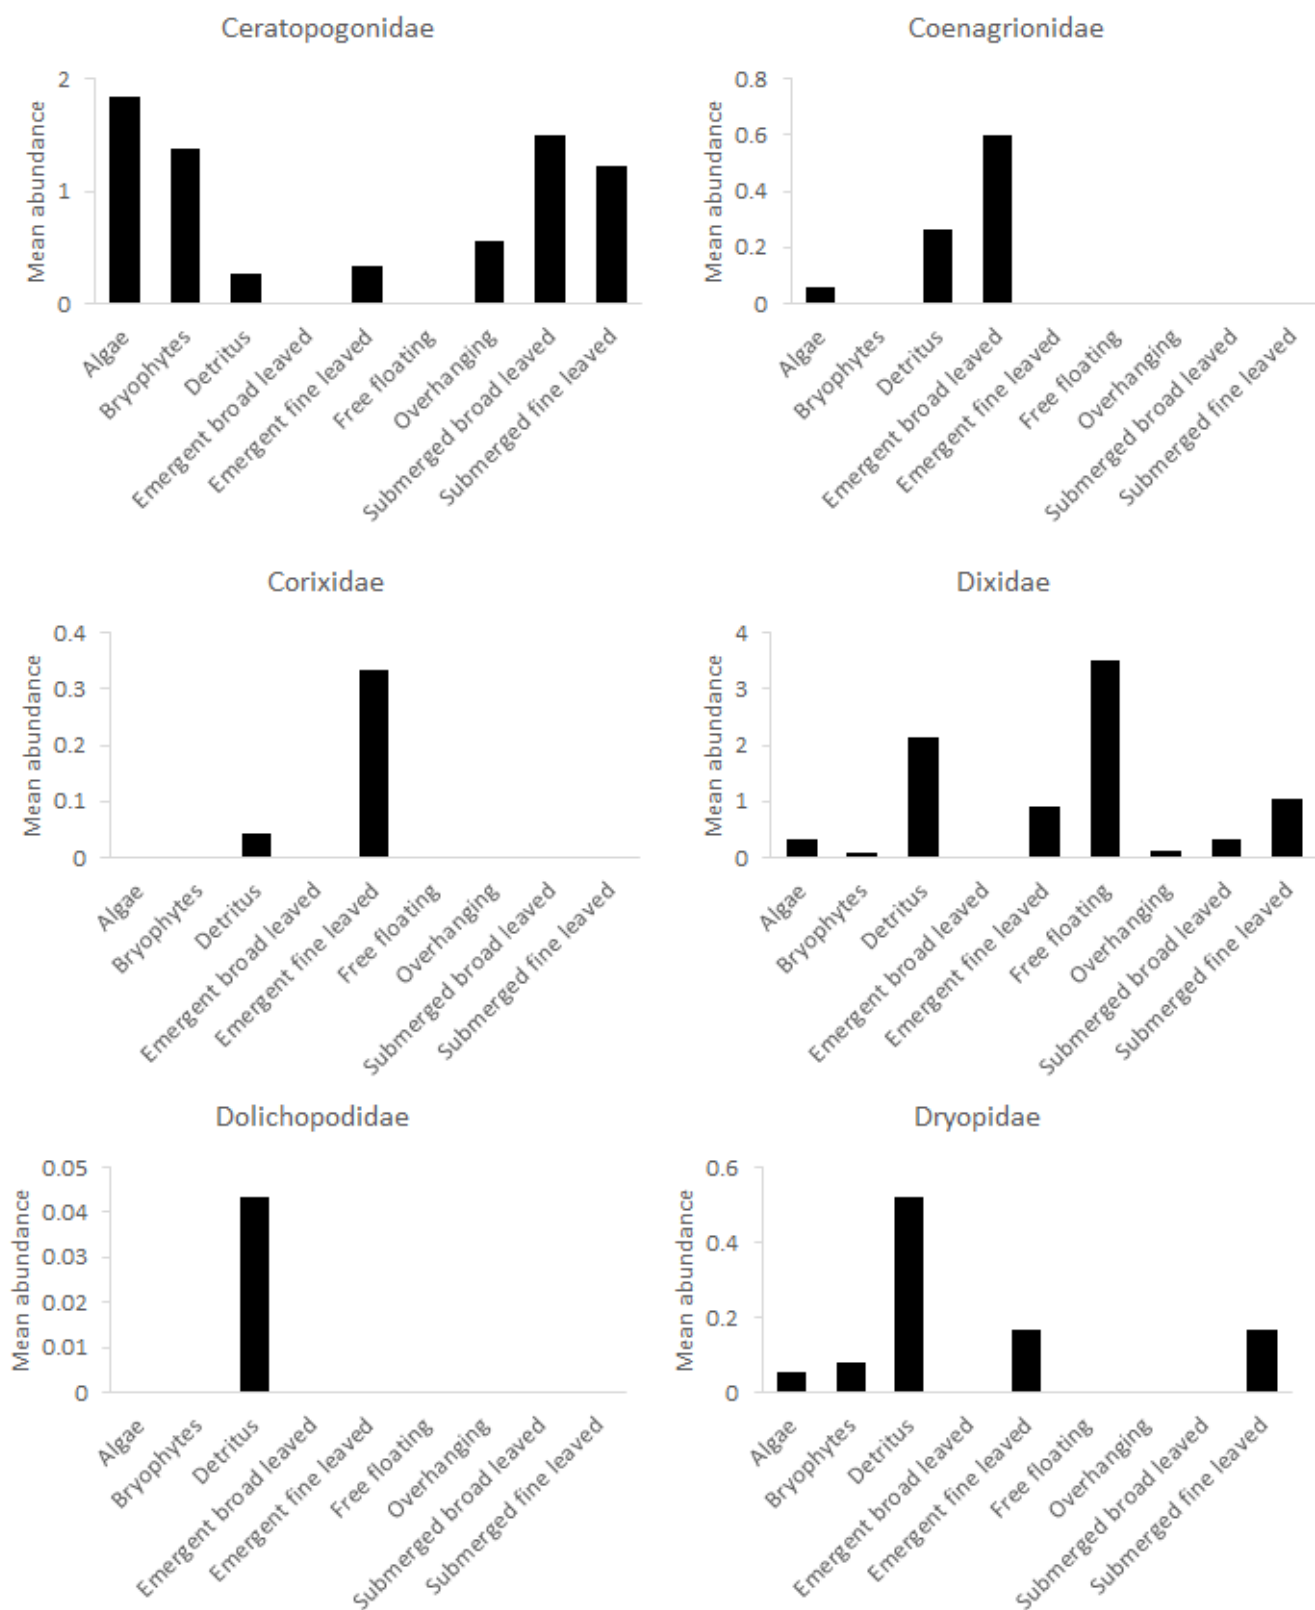

Figure S1 (Continued).

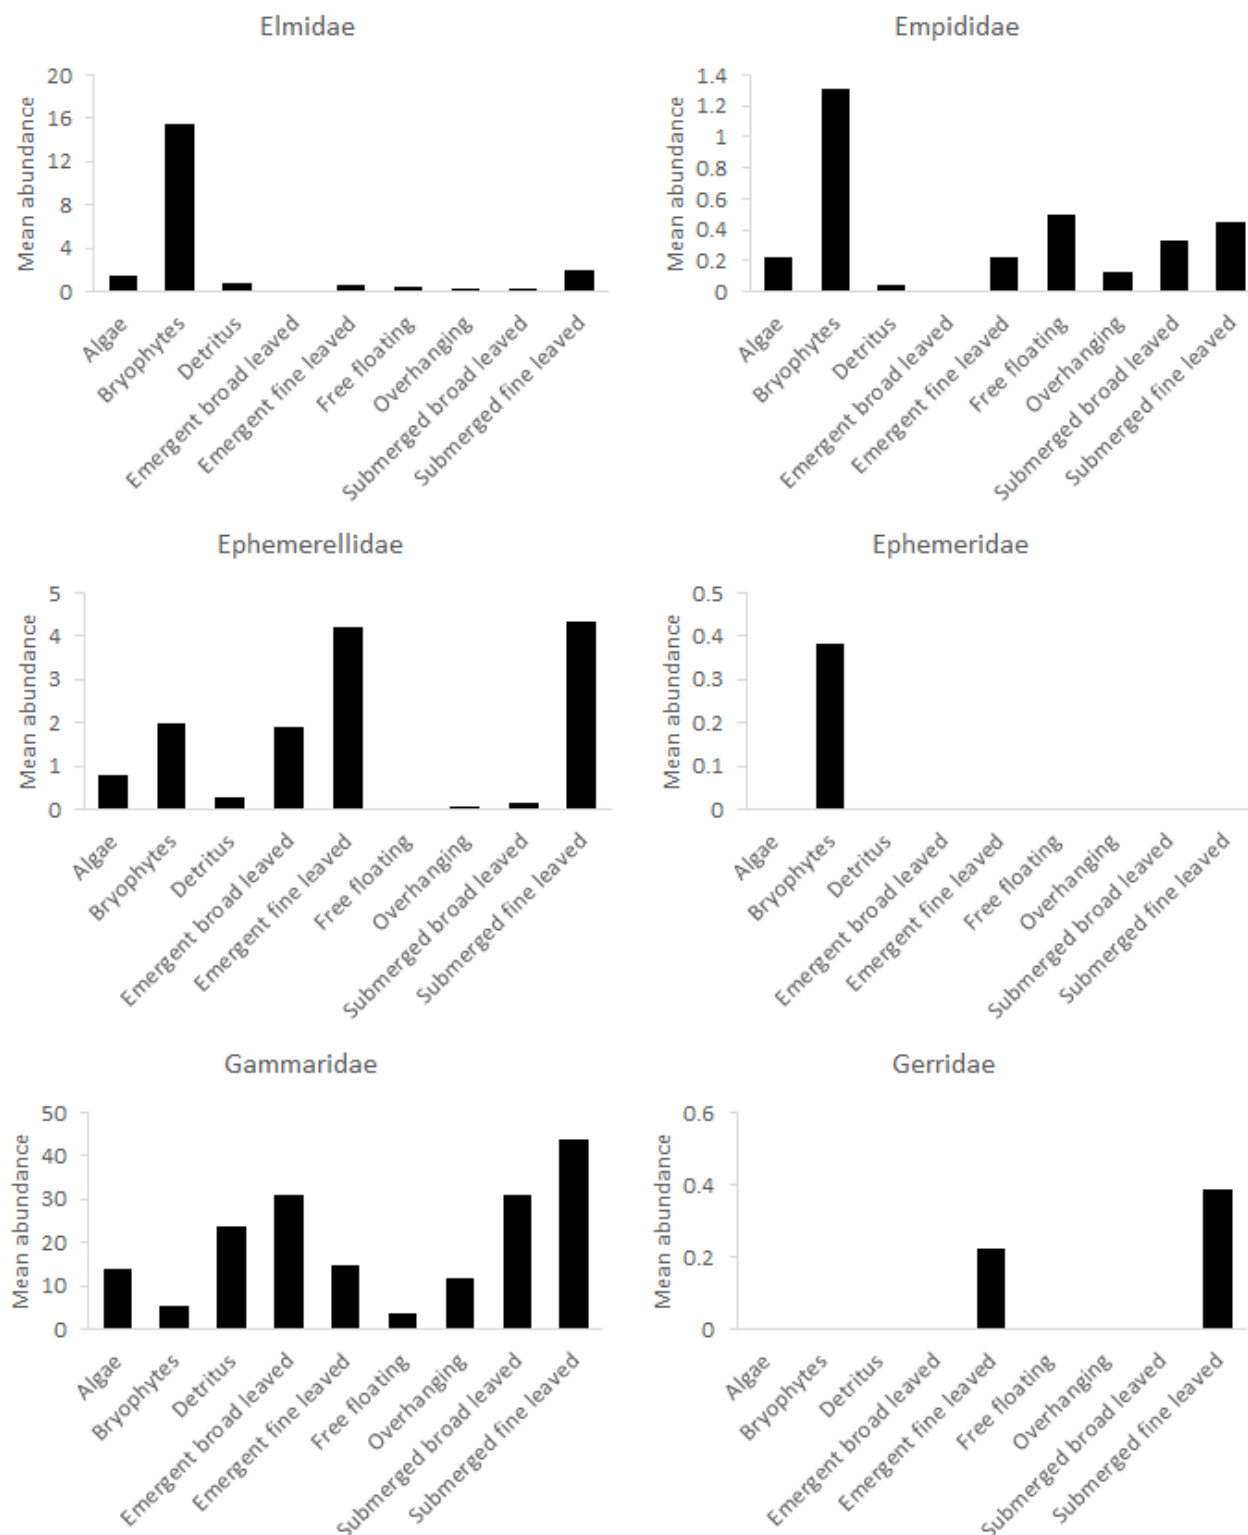

Figure S1 (Continued).

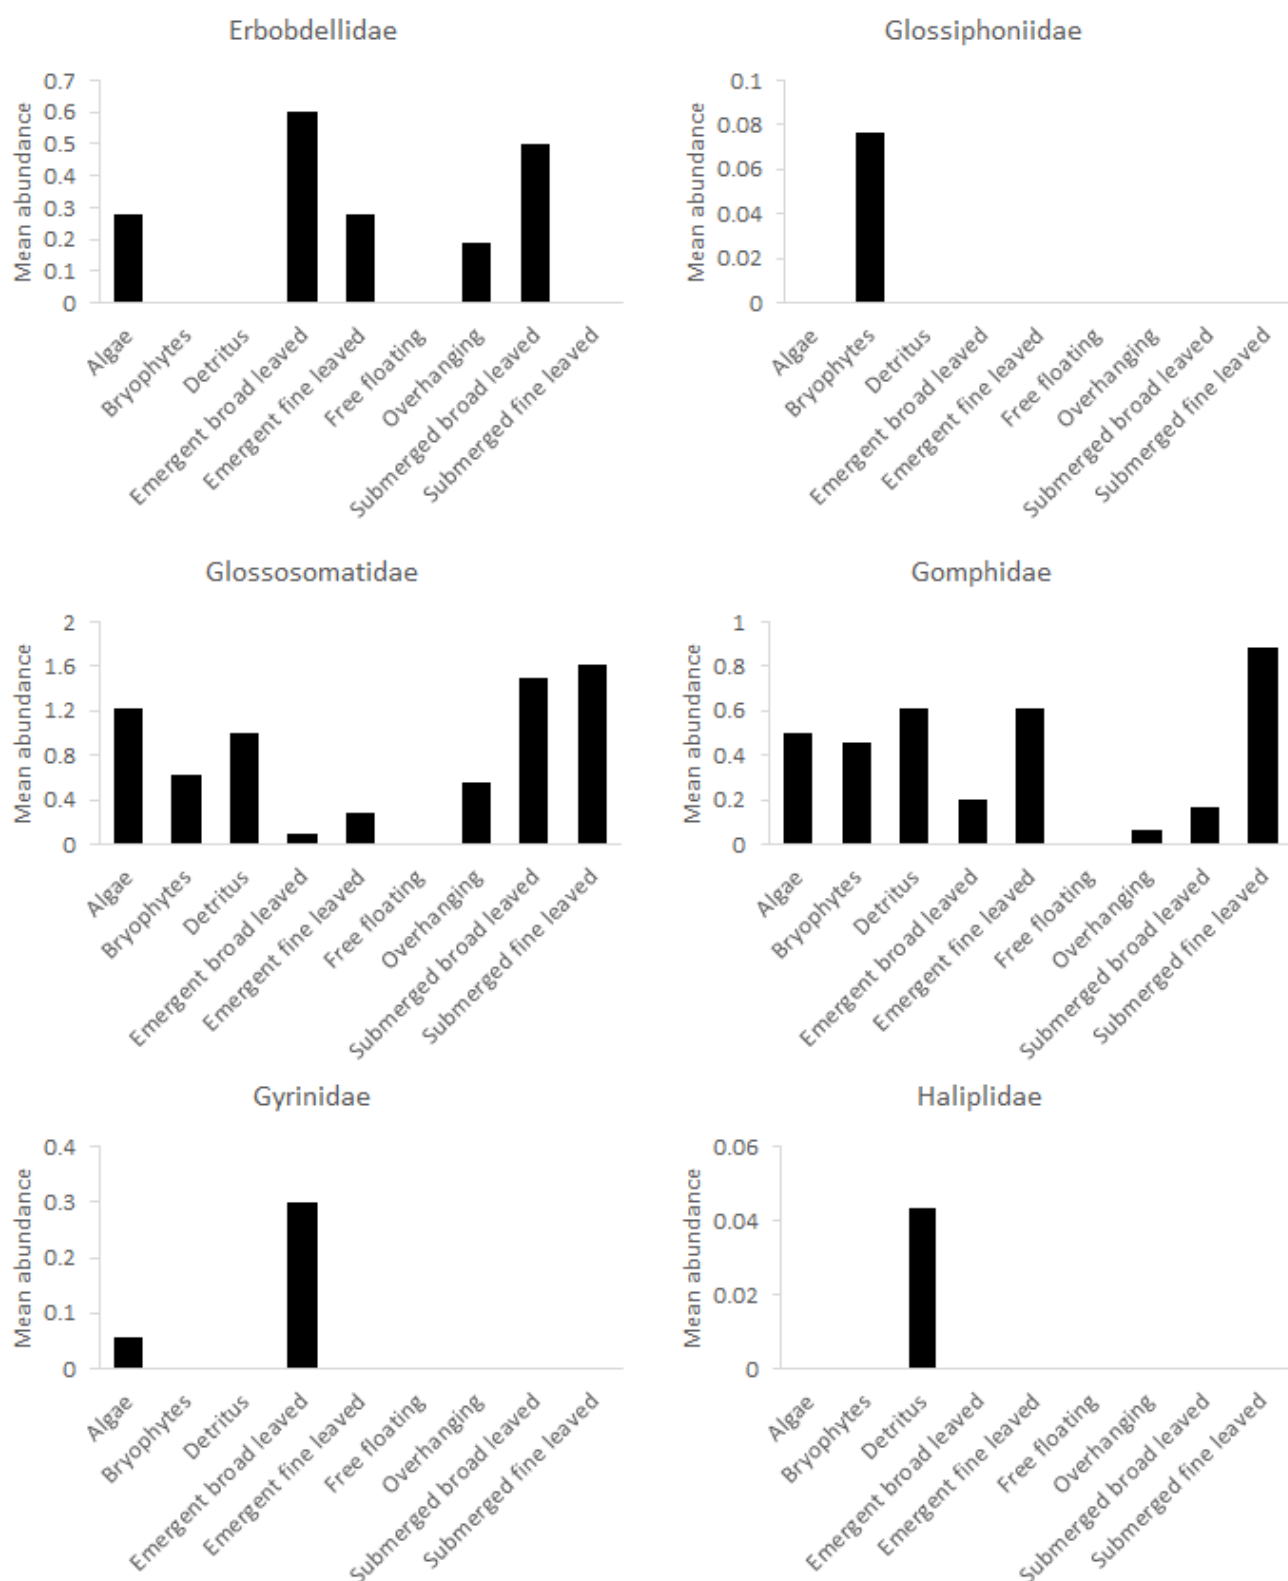

Figure S1 (Continued).

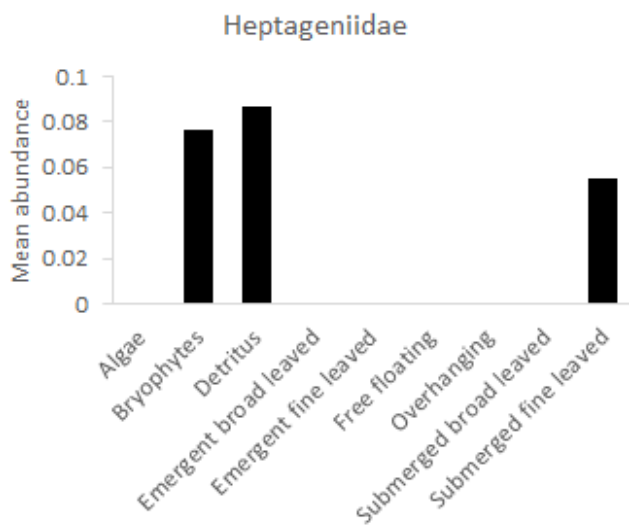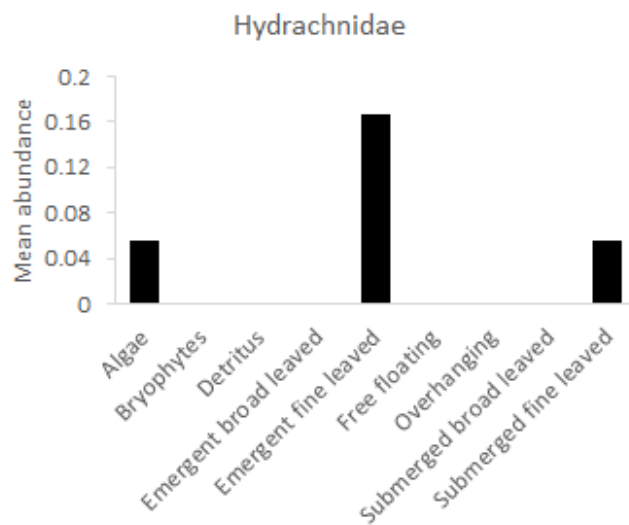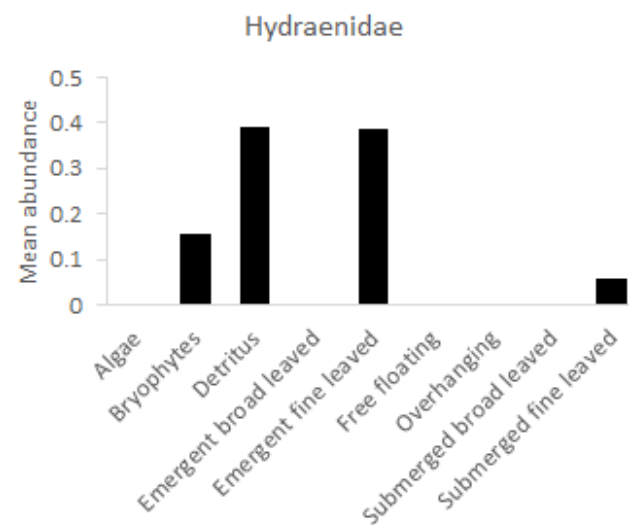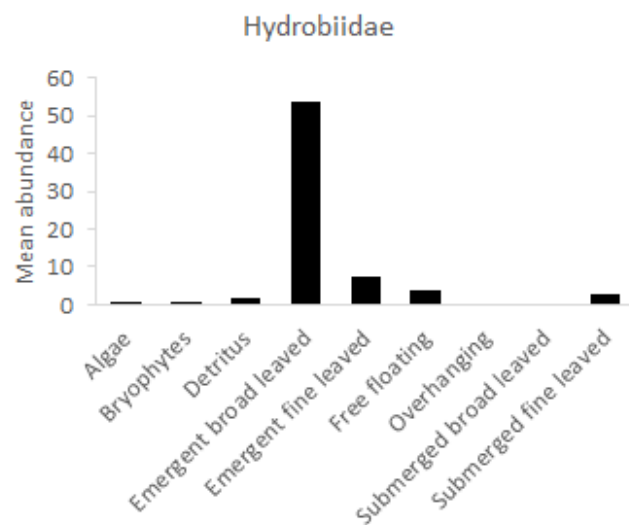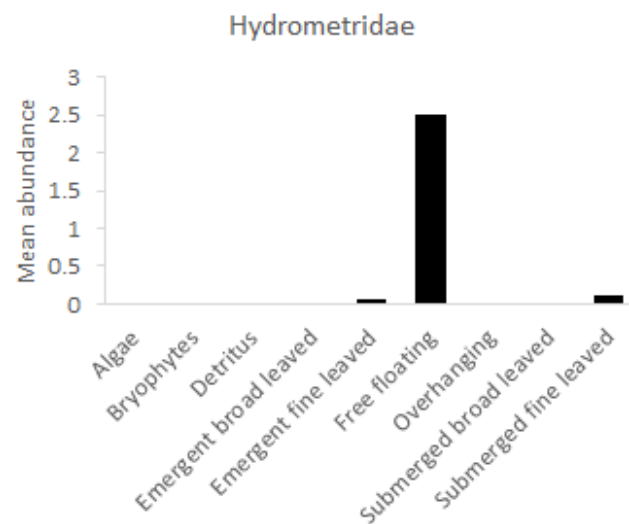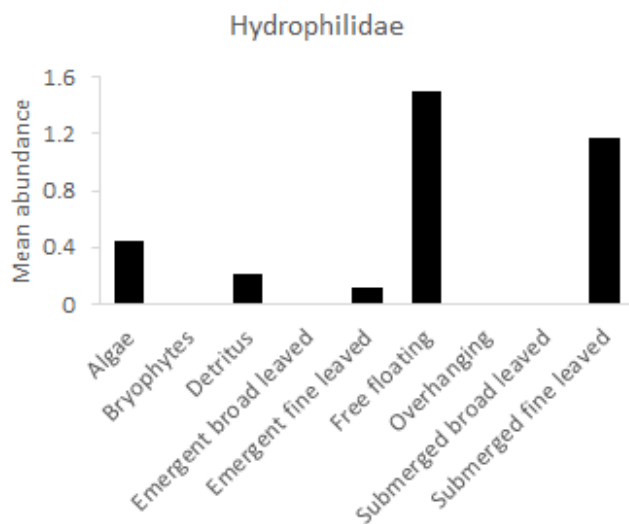

Figure S1 (Continued).

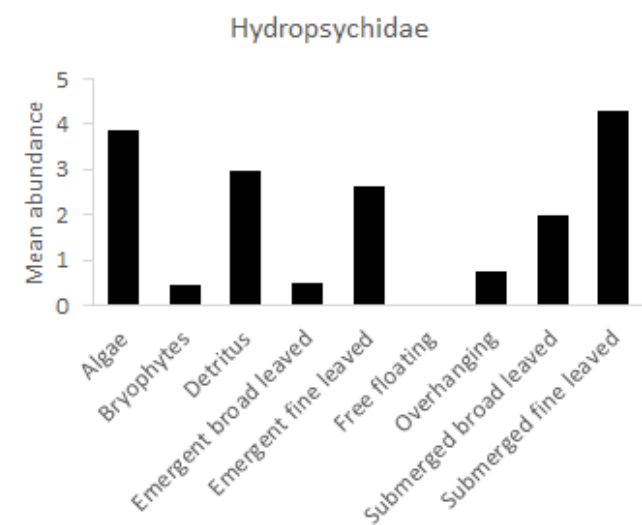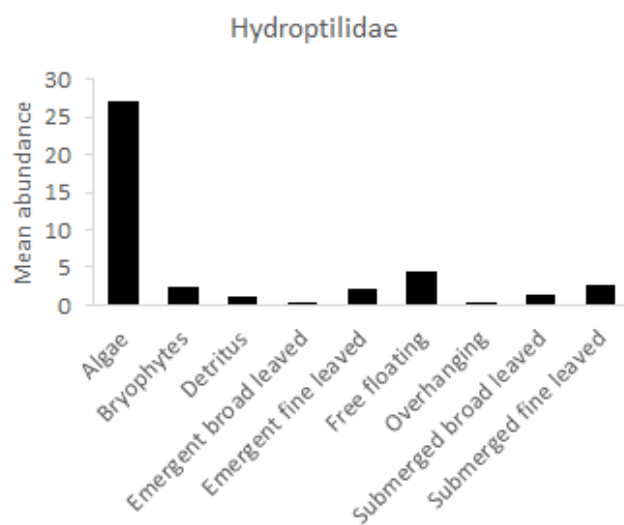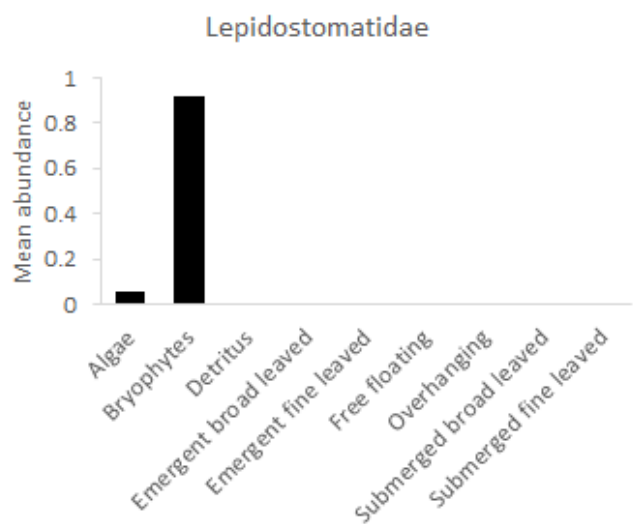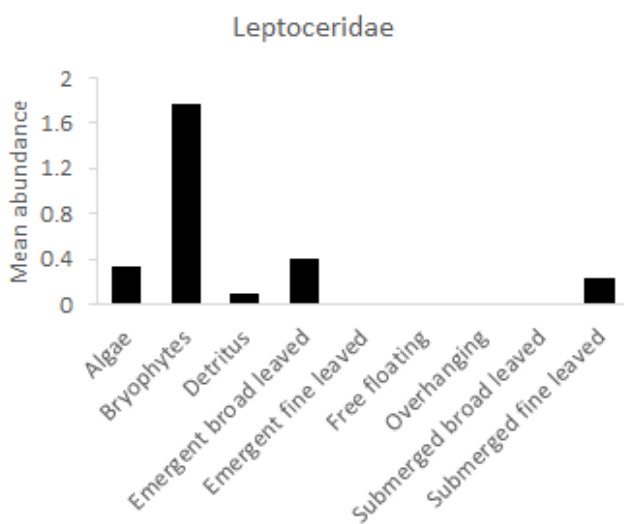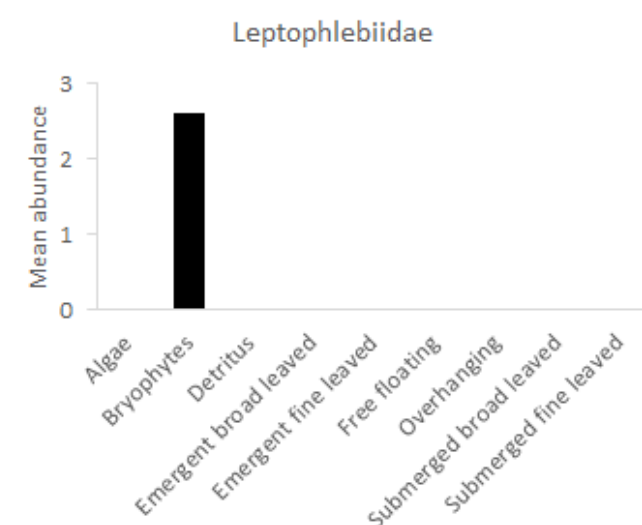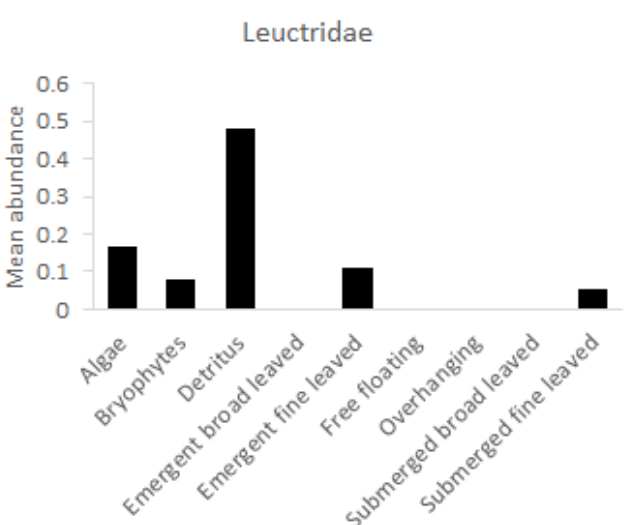

Figure S1 (Continued).

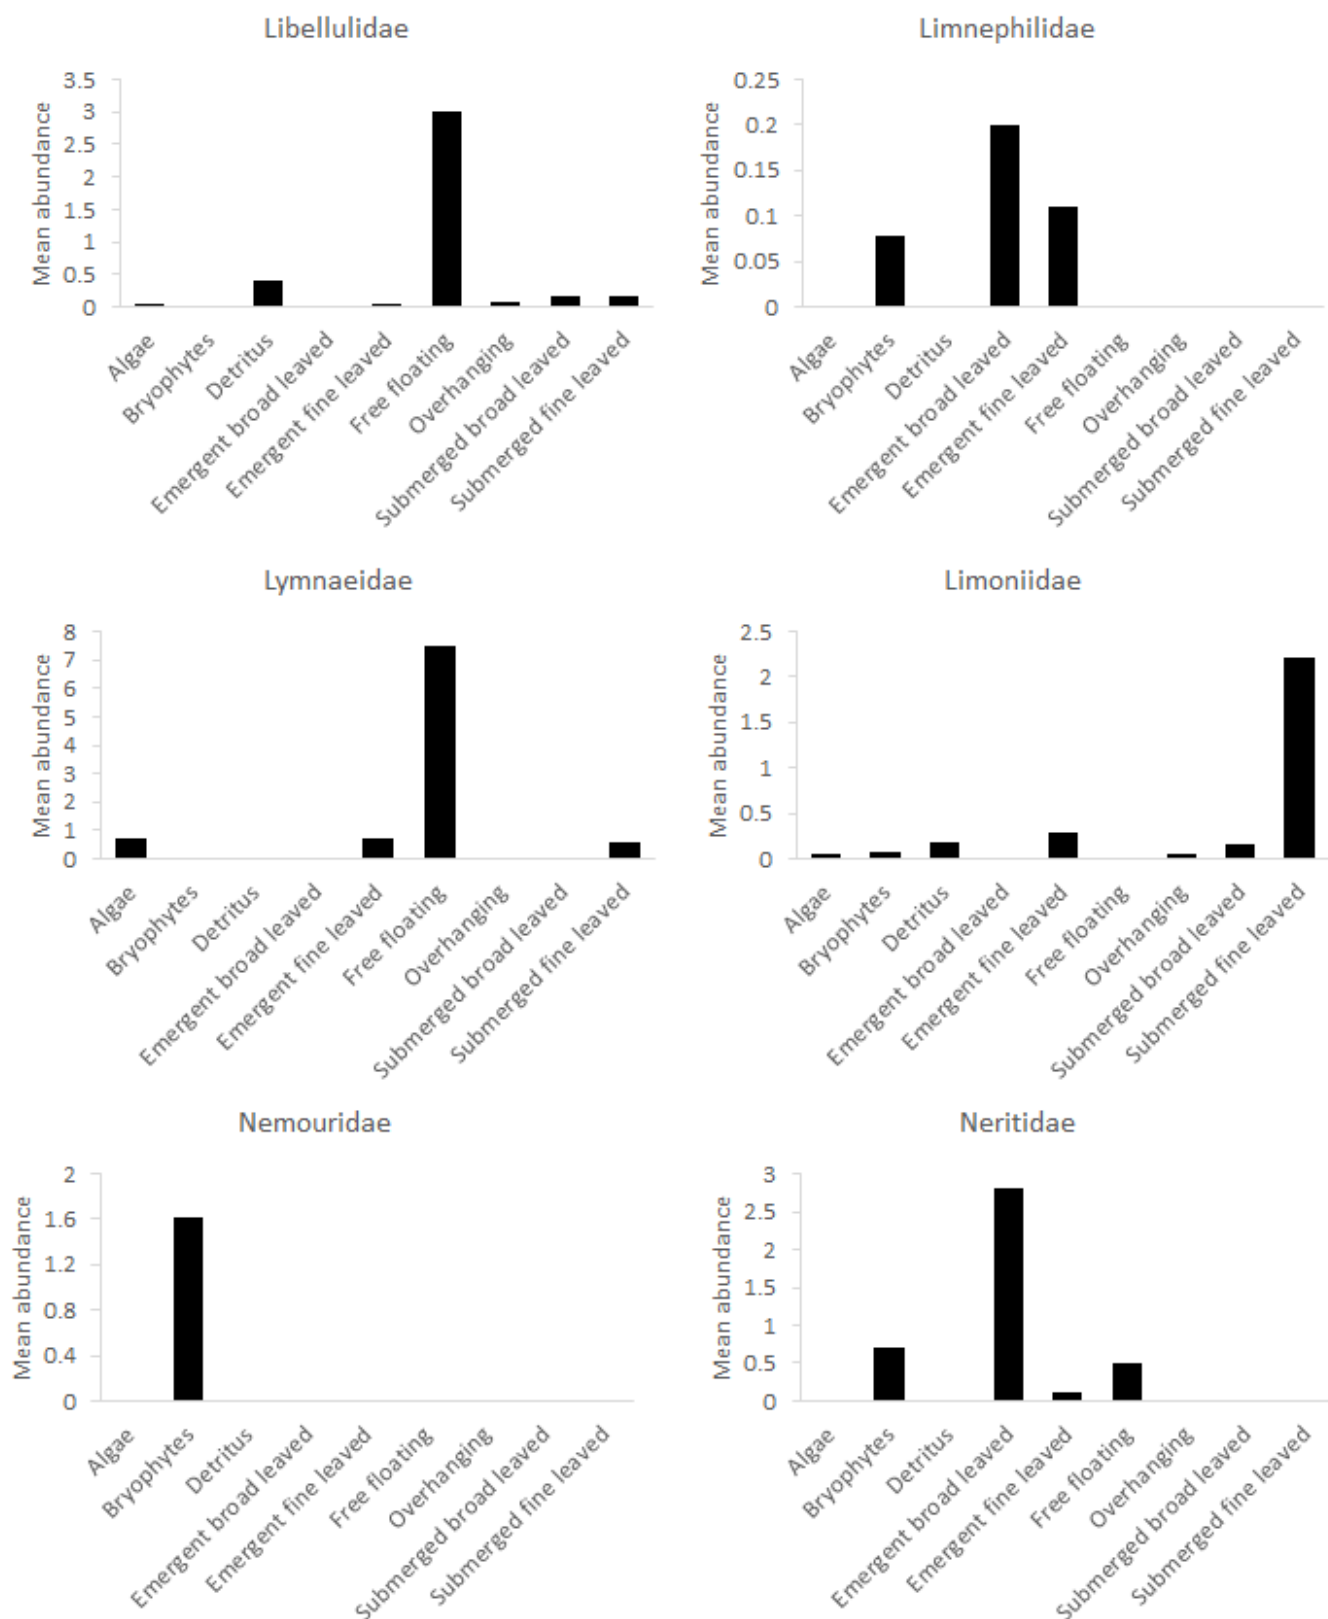

Figure S1 (Continued).

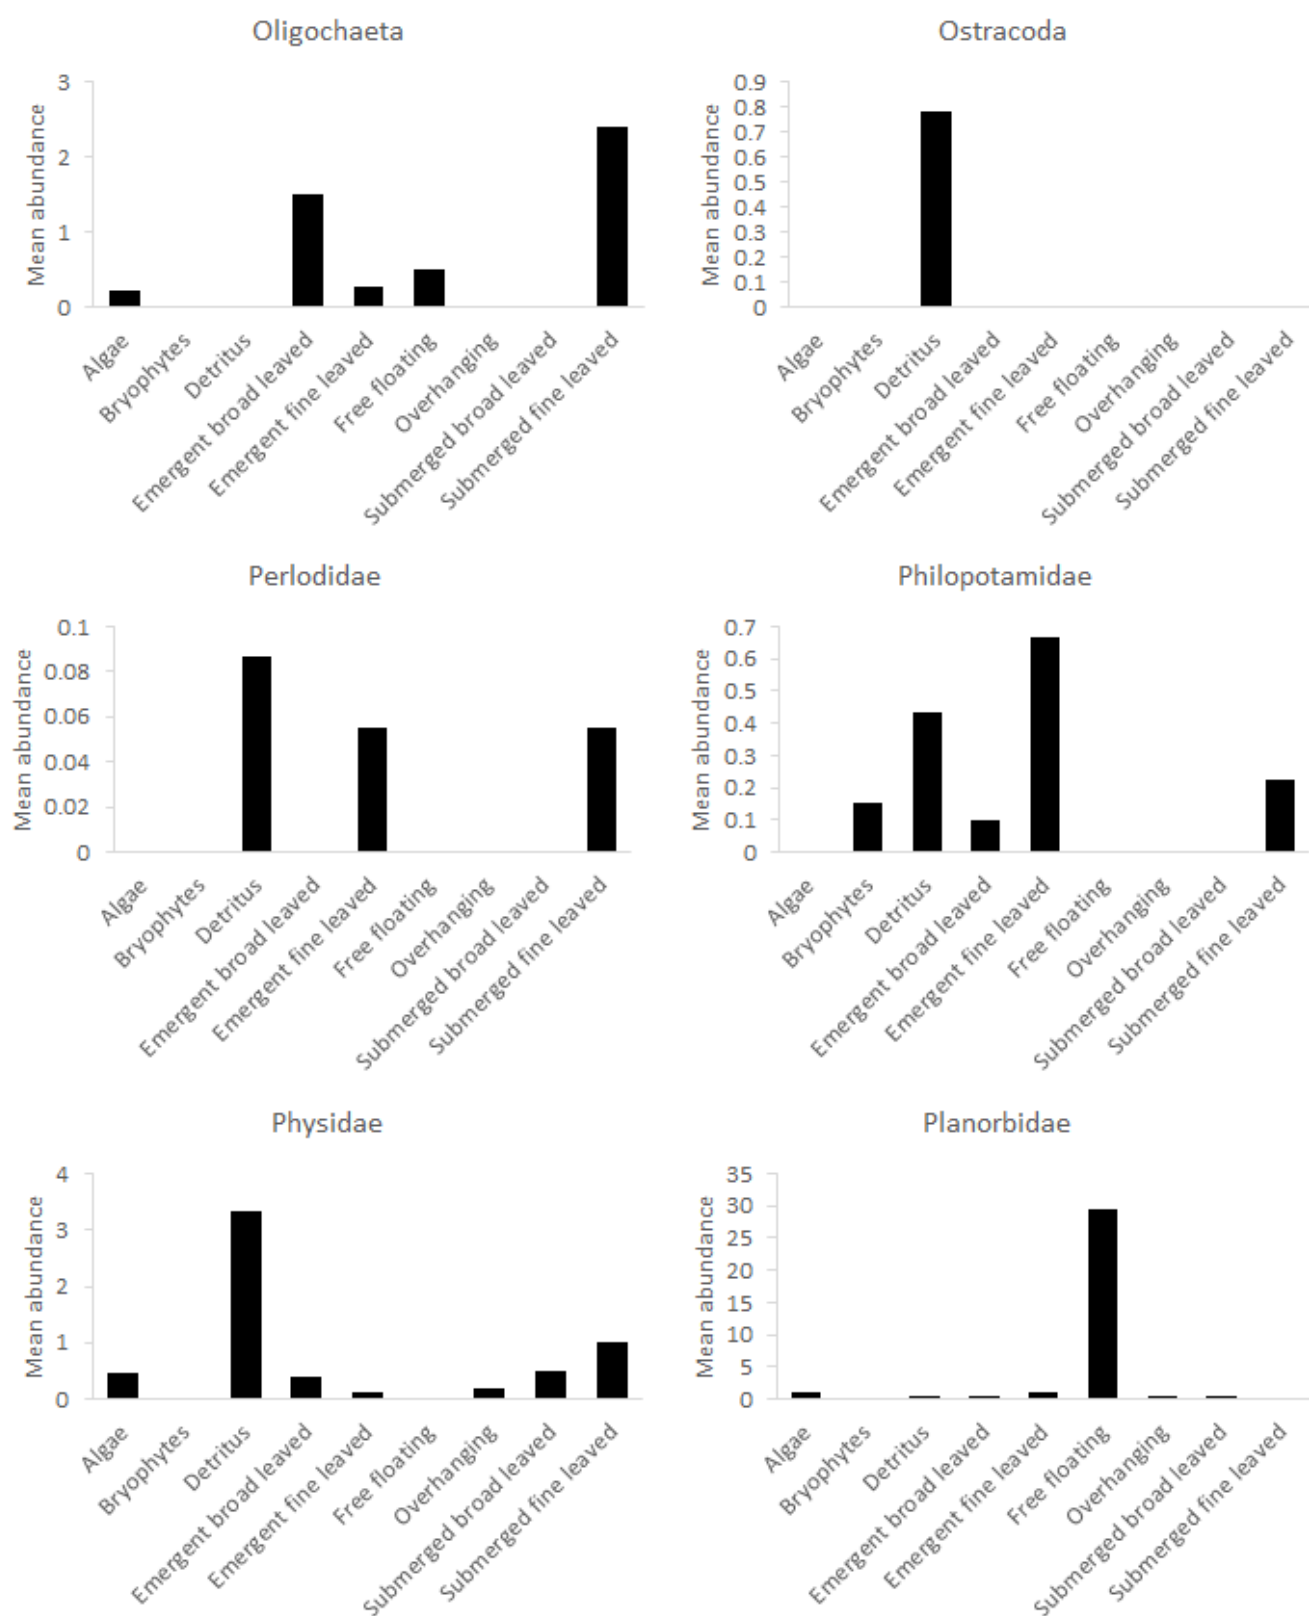

Figure S1 (Continued).

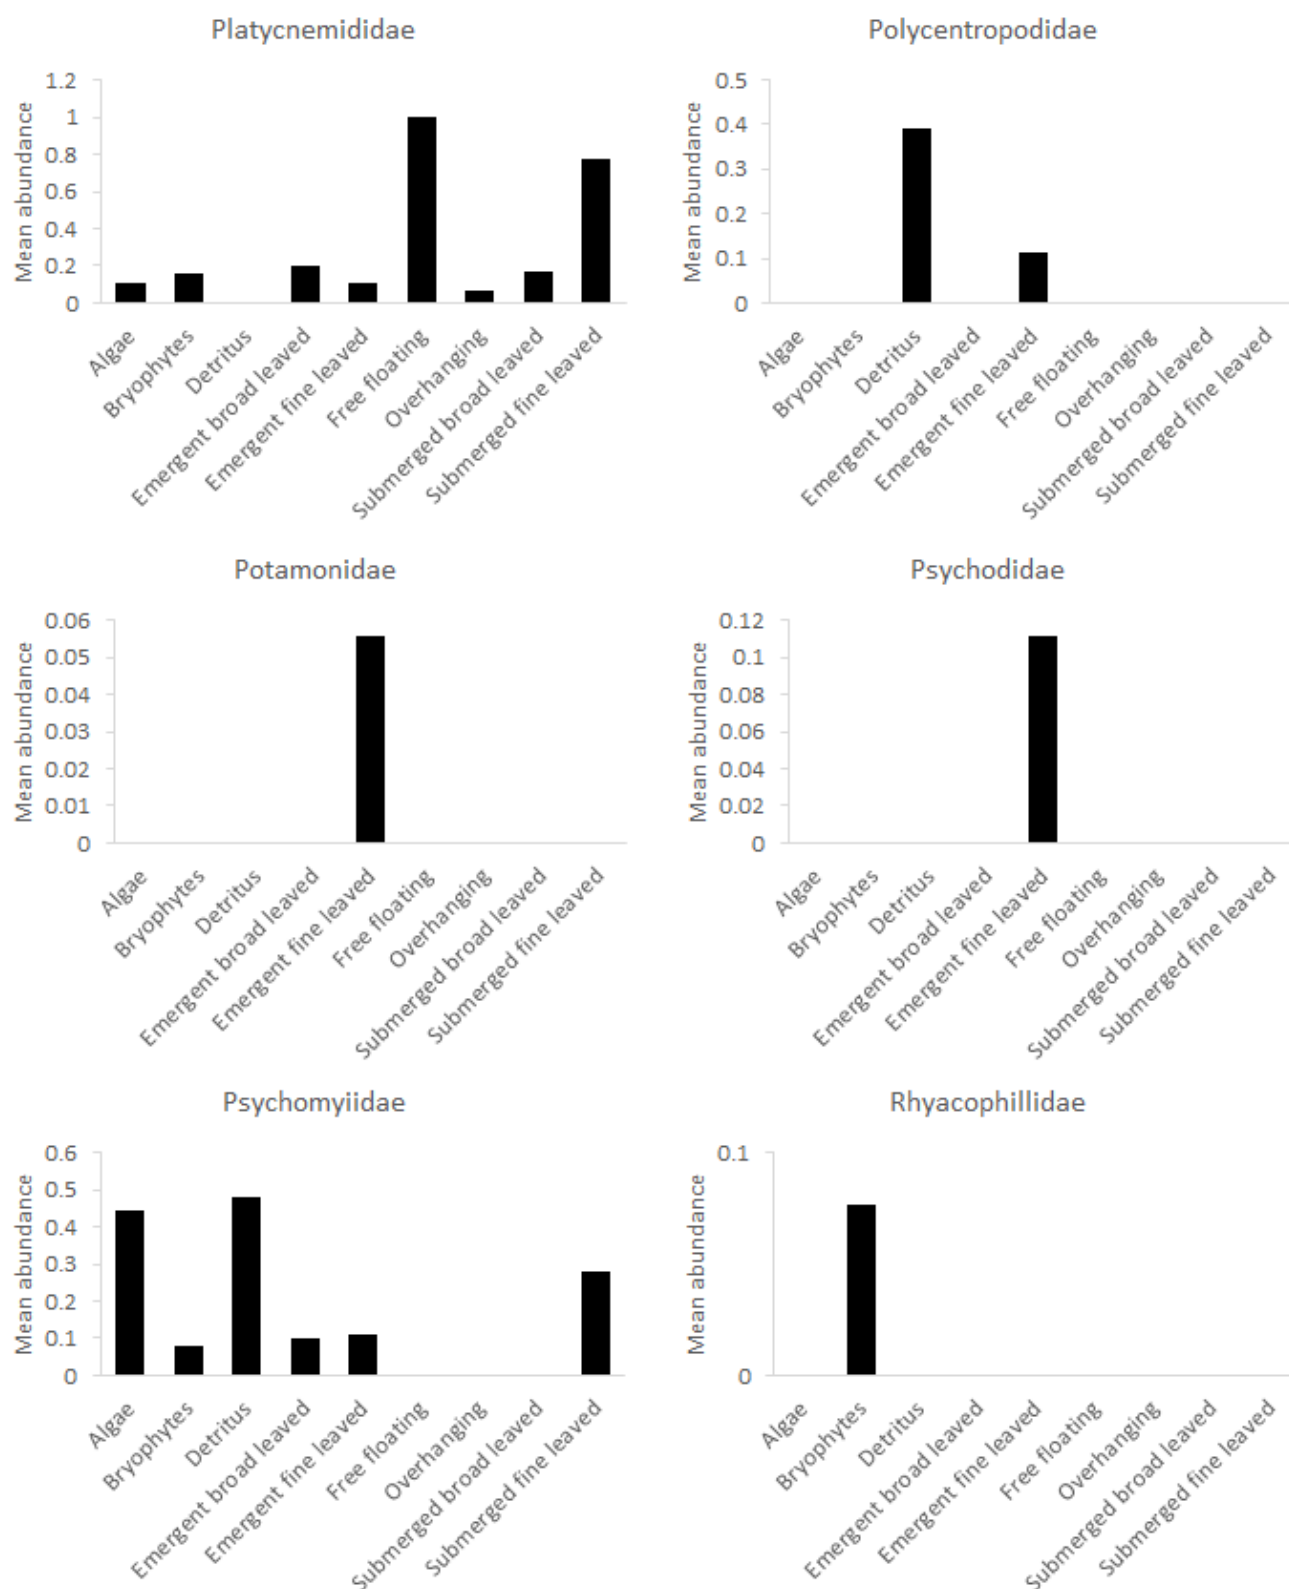

Figure S1 (Continued).

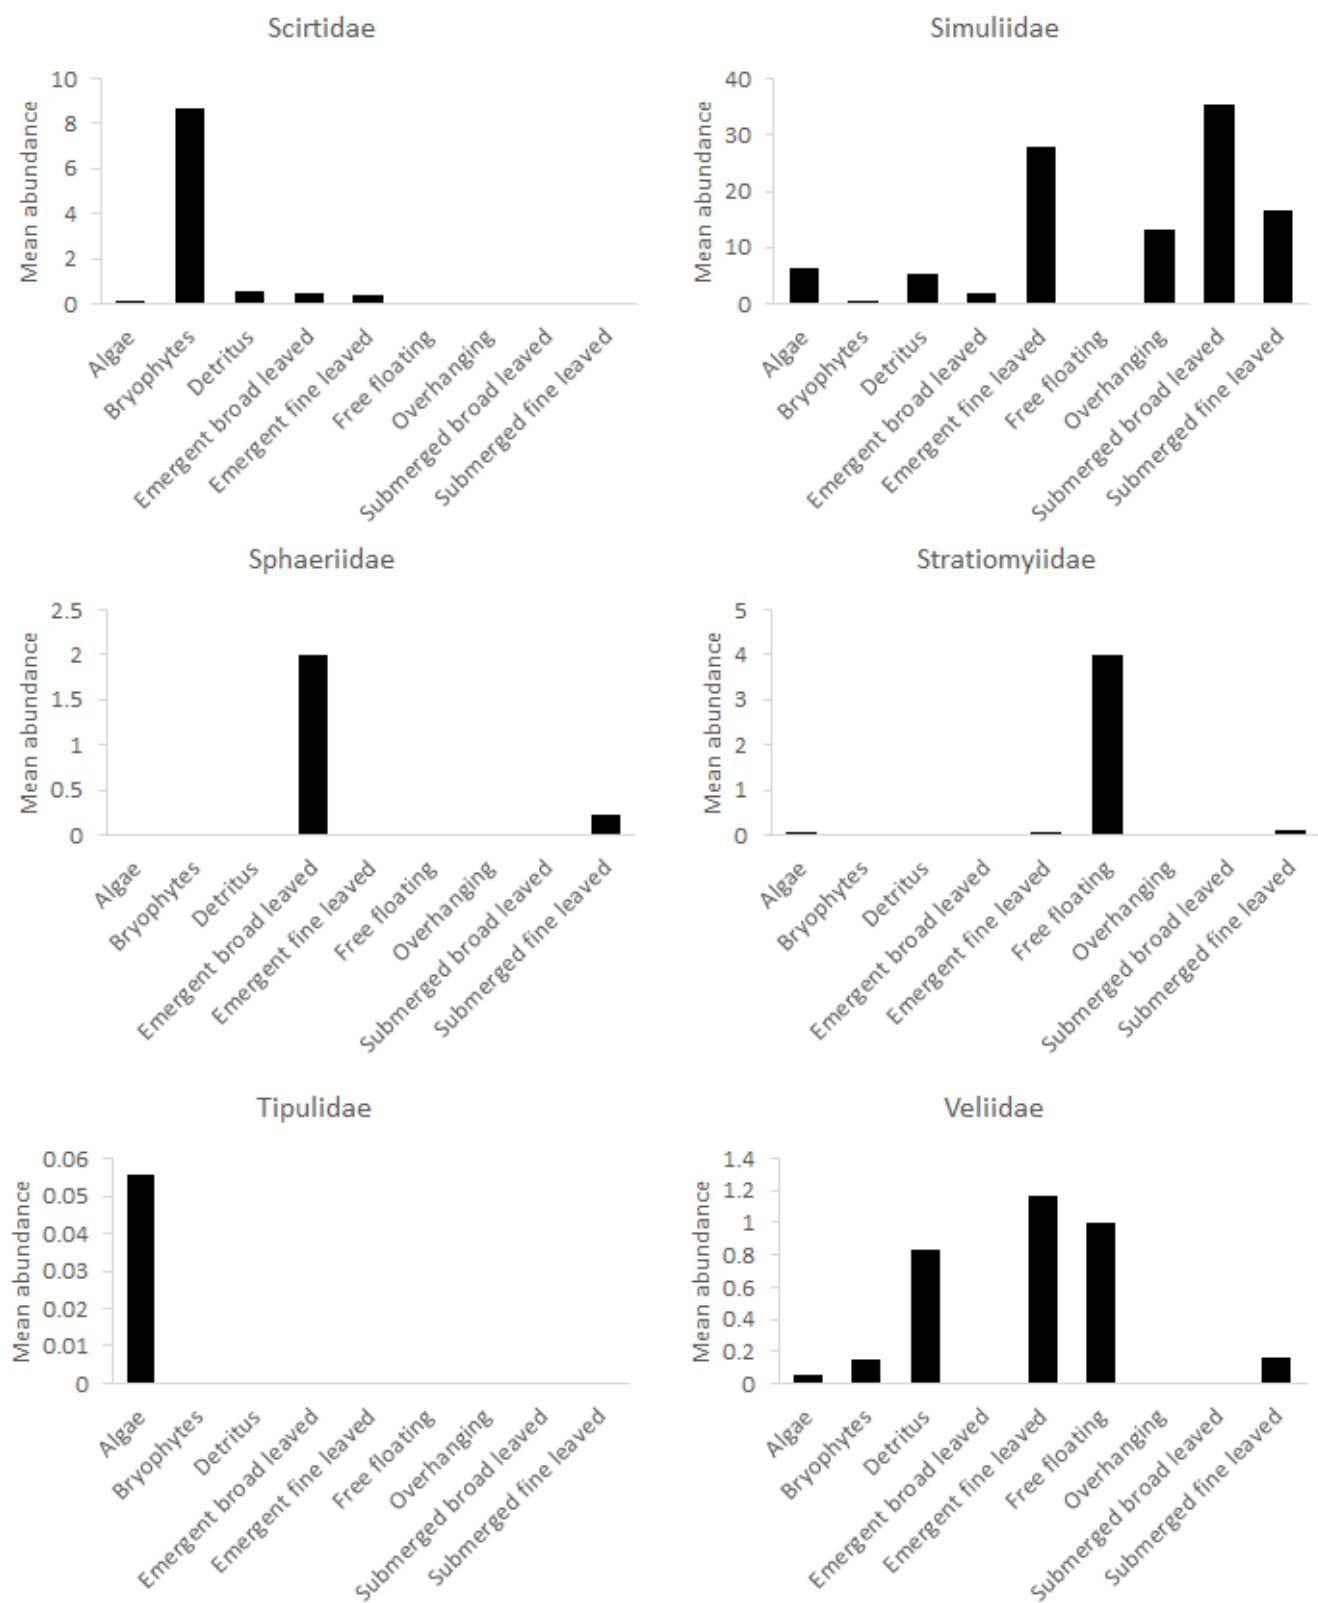

Figure S1 (Continued).
